# Supplementary material for: Phosphate functionalized nonisocyanate polyurethanes with bio-origin, water solubility and biodegradability
Source: Royal Society of Chemistry journal article supplement (doi:10.1039/d3gc03379a), 2023-12-12
Supplement: d3gc03379a1.pdf [file d3gc03379a1.pdf]

# Phosphate Functionalized Nonisocyanate Polyurethanes with Bio-origin, Water Solubility and Biodegradability

Eric Kwok Wai Tam<sup>[a]</sup>, Ning Xi Chong<sup>[a]</sup>, Ping Sen Choong<sup>[a]</sup>, Barindra Sana<sup>[b]</sup>, Abdul Majeed Seayad<sup>[a]</sup>, Satyasankar Jana<sup>\*[a]</sup>, and Jayasree Seayad<sup>\*[a]</sup>

<sup>a</sup>Institute of Sustainability for Chemicals, Energy and Environment (ISCE2) and <sup>b</sup>Singapore Institute of Food and Biotechnology Innovation (SIFBI)

Agency for Science, Technology and Research (A\*STAR)

1 Pesek Road, Singapore, 627833

Republic of Singapore

\*Email: [satyasankar\\_jana@isce2.a-star.edu.sg](mailto:satyasankar_jana@isce2.a-star.edu.sg) and [jayasree\\_seayad@isce2.a-star.edu.sg](mailto:jayasree_seayad@isce2.a-star.edu.sg)

## Supporting Information

### Table of contents

|                                                                                               |    |
|-----------------------------------------------------------------------------------------------|----|
| FTIR Spectra.....                                                                             | 2  |
| NMR Spectra.....                                                                              | 4  |
| GPC Chromatograms.....                                                                        | 8  |
| DSC thermograms.....                                                                          | 11 |
| TGA spectra.....                                                                              | 14 |
| <i>E</i> factor calculation .....                                                             | 18 |
| Microscopic image of olive oil in water emulsions without the use of any other additive ..... | 21 |

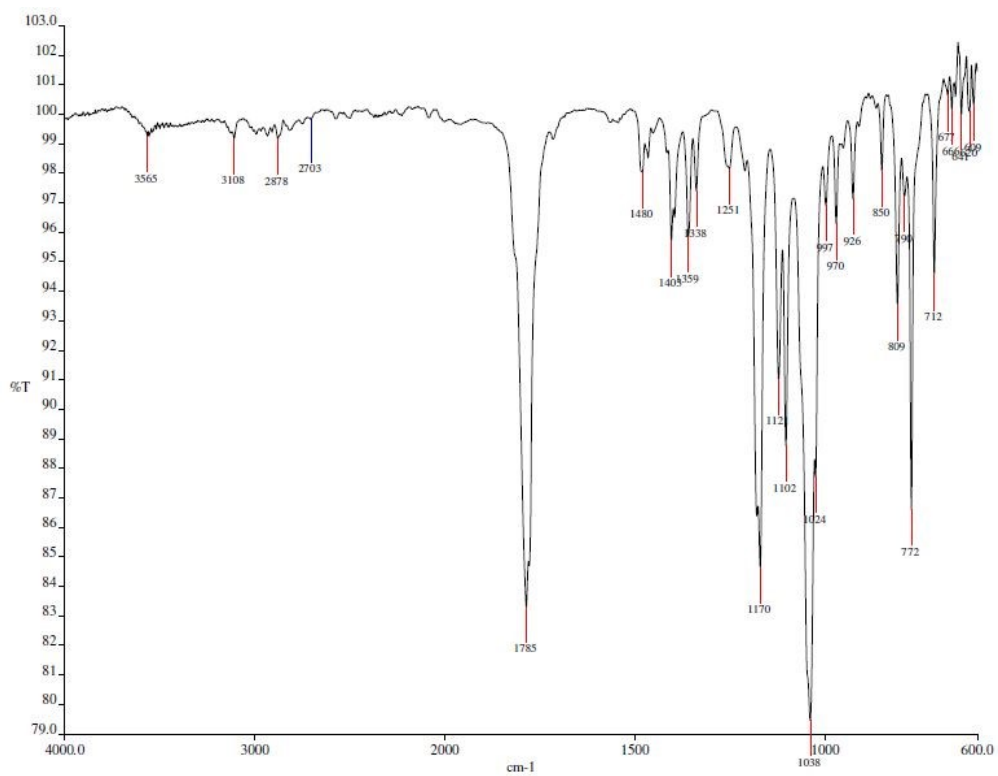

Figure S1: FTIR spectrum of FuBCC monomer

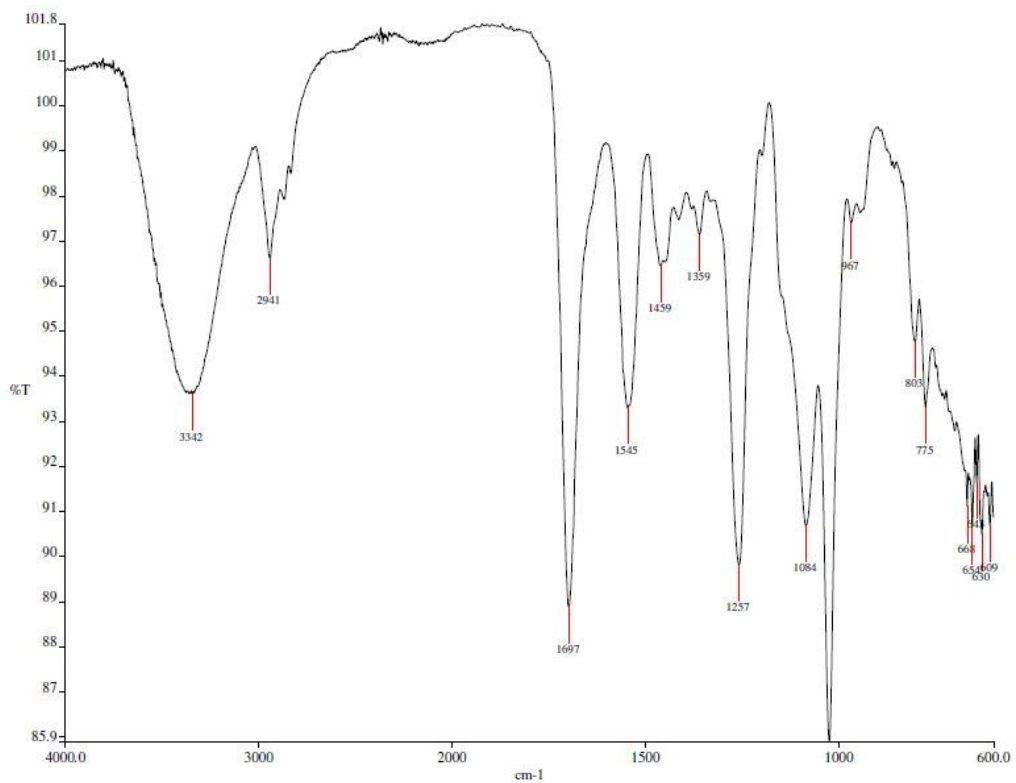

Figure S2: FTIR spectrum of Poly(FuCa)

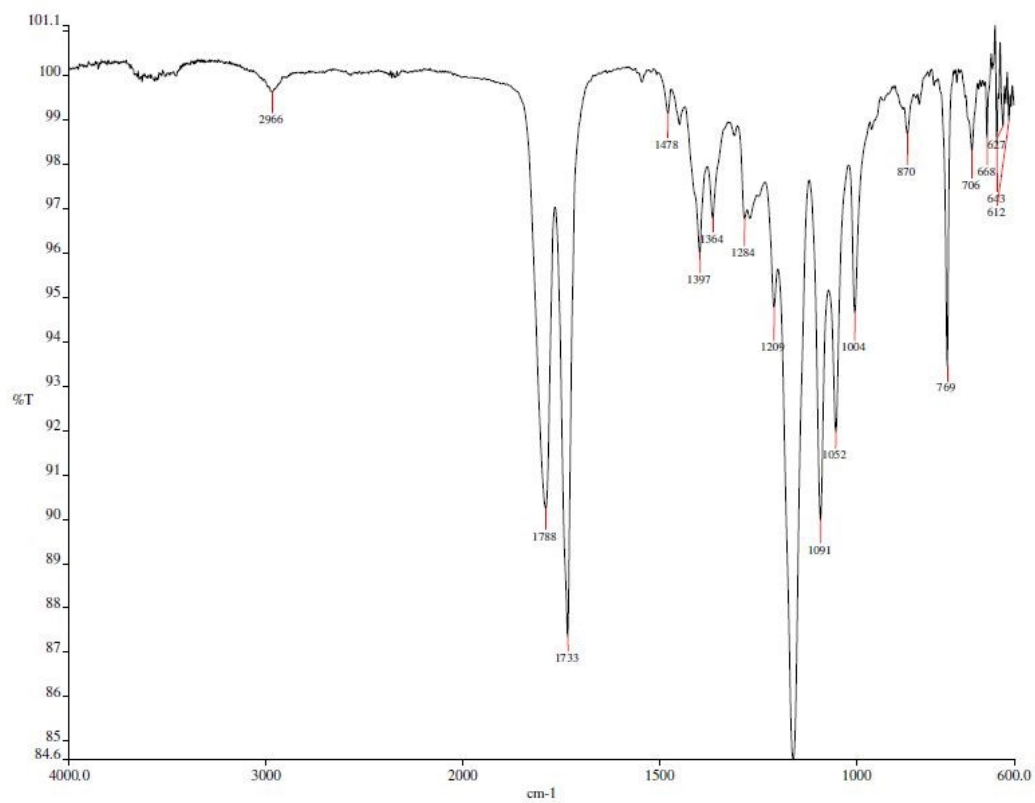

Figure S3: FTIR spectrum of SuBCC monomer

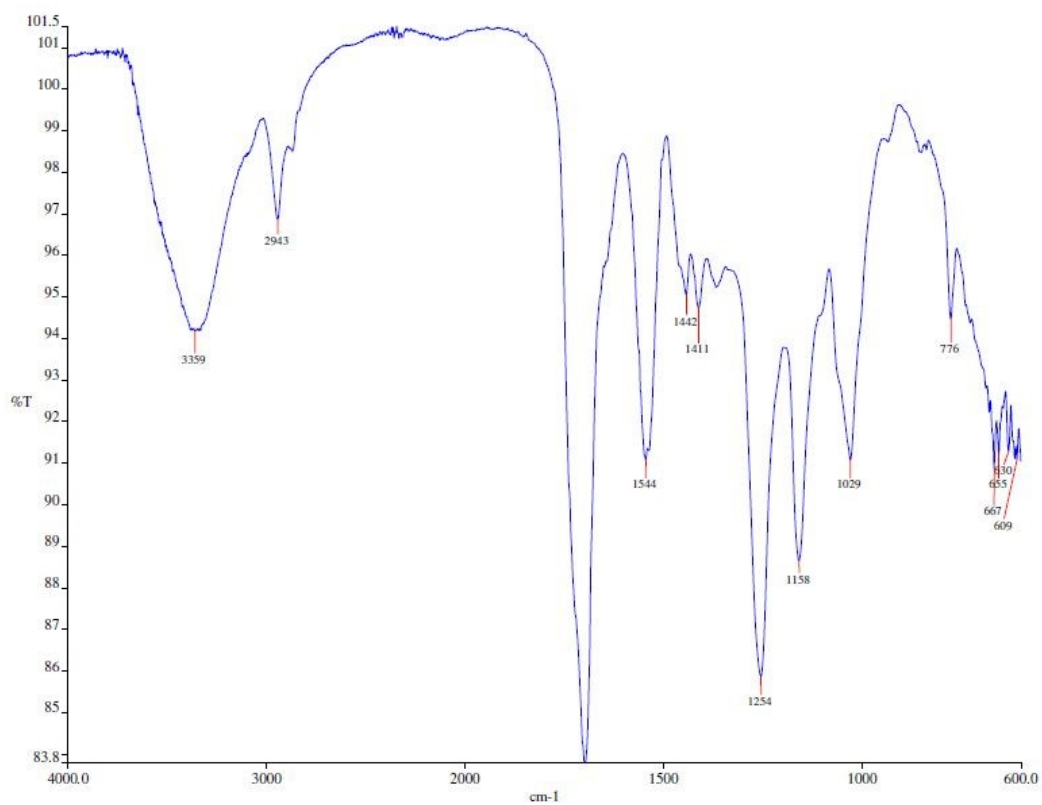

Figure S4: FTIR spectrum of Poly(SuCa)

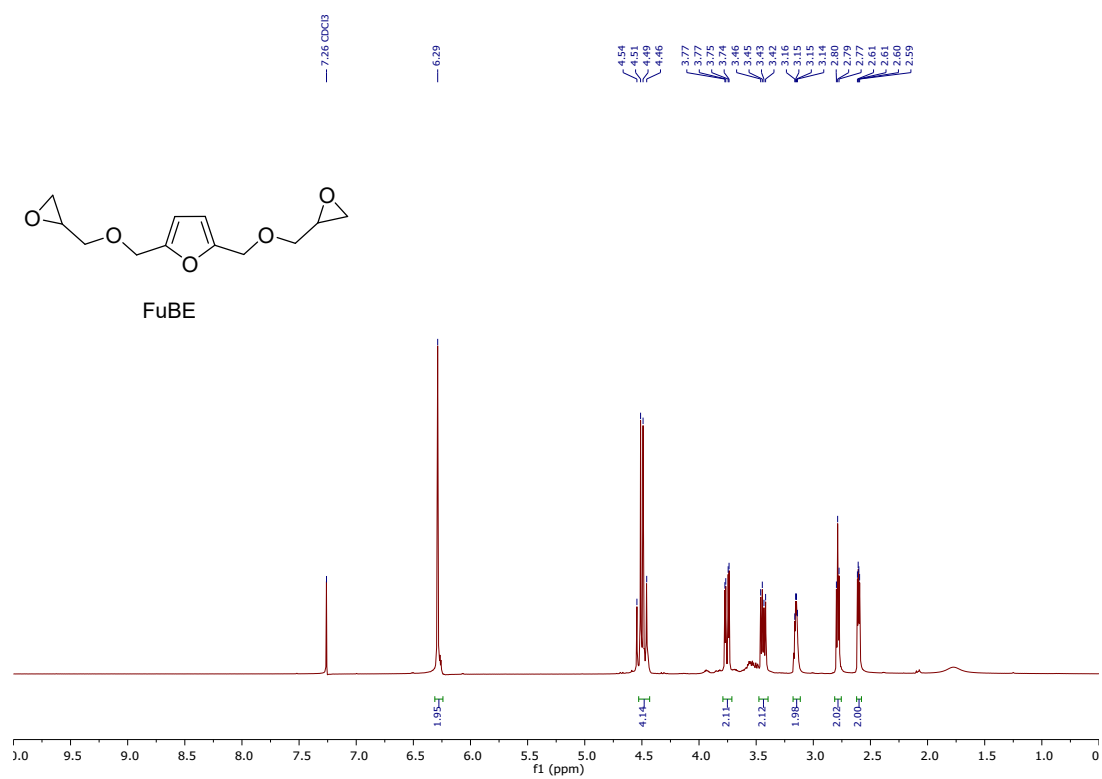

Figure S5: <sup>1</sup>H NMR spectrum of FuBE in CDCl<sub>3</sub>

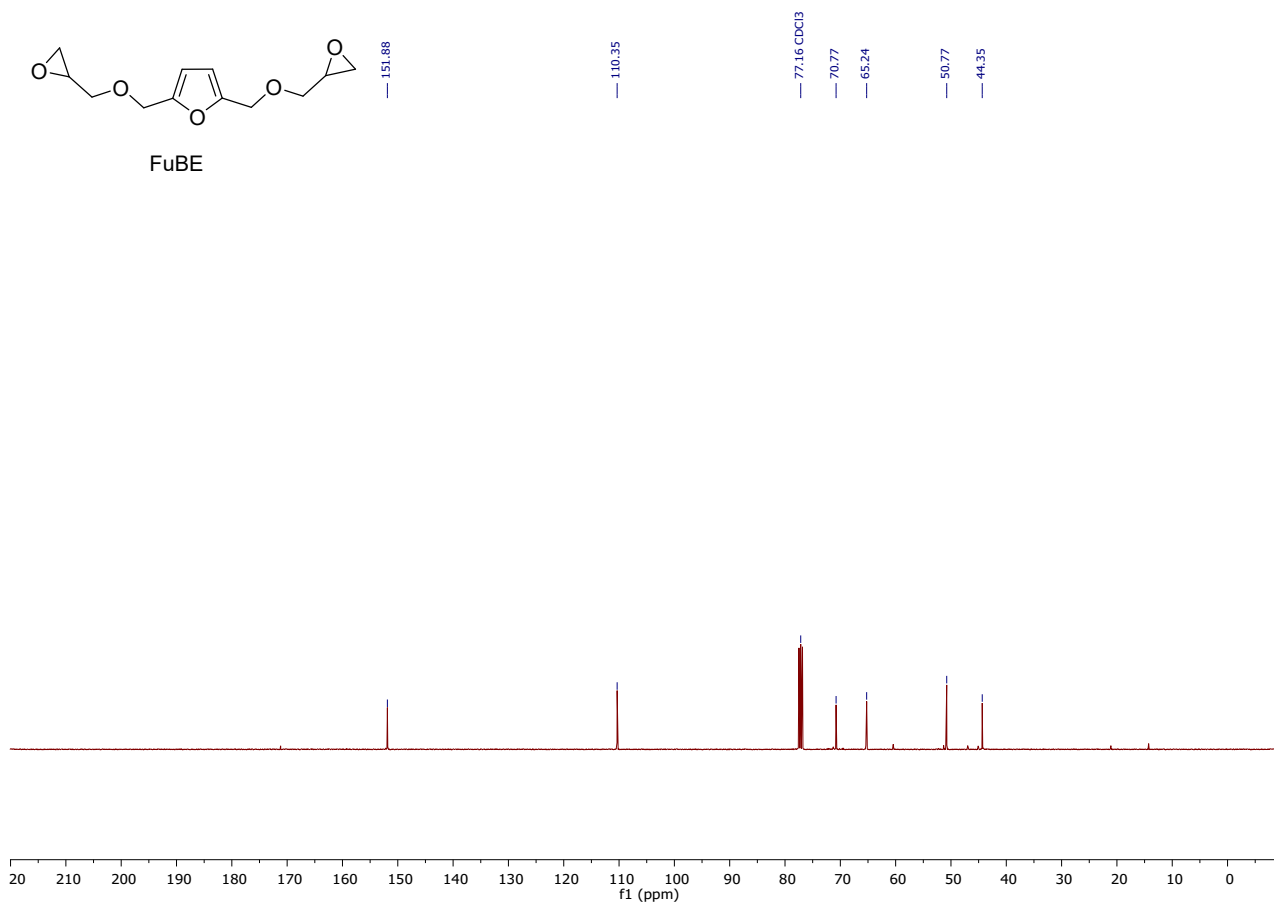

Figure S6:  $^{13}\text{C}$  NMR spectrum of FuBE in  $\text{CDCl}_3$

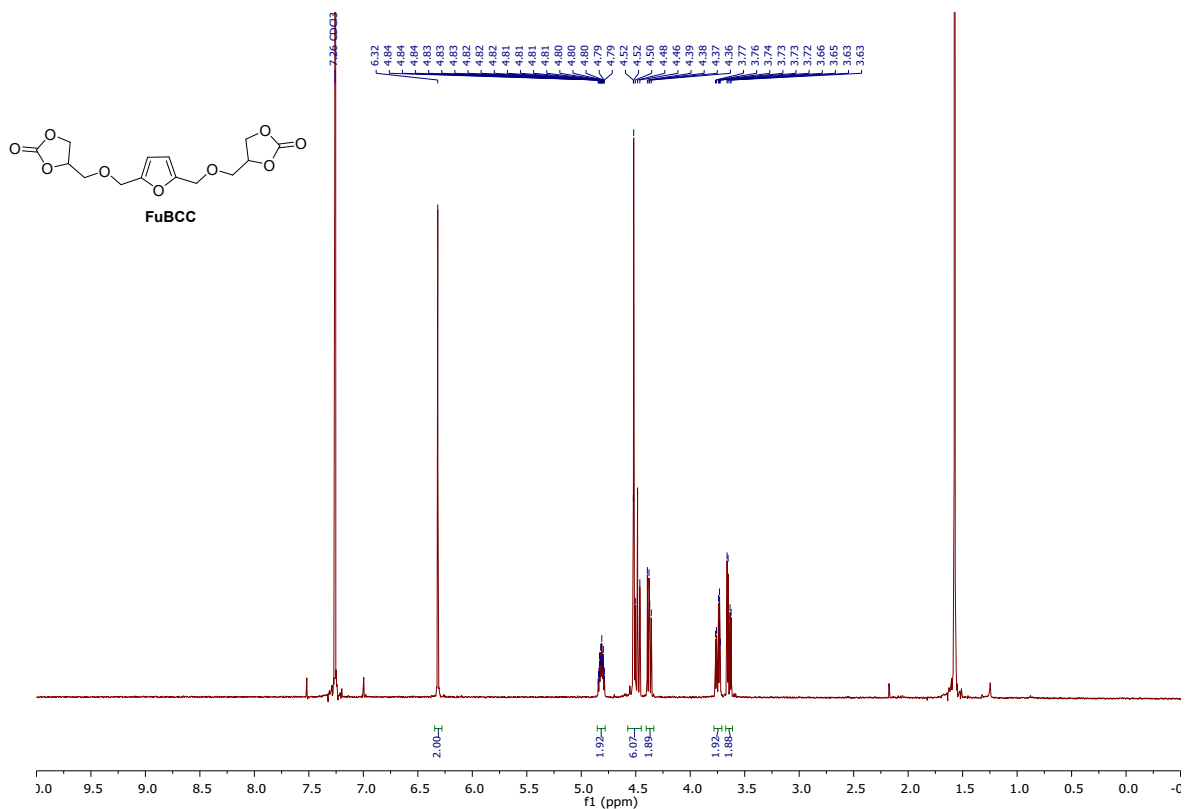

Figure S7:  $^1\text{H}$  NMR spectrum of FuBCC monomer in  $\text{CDCl}_3$

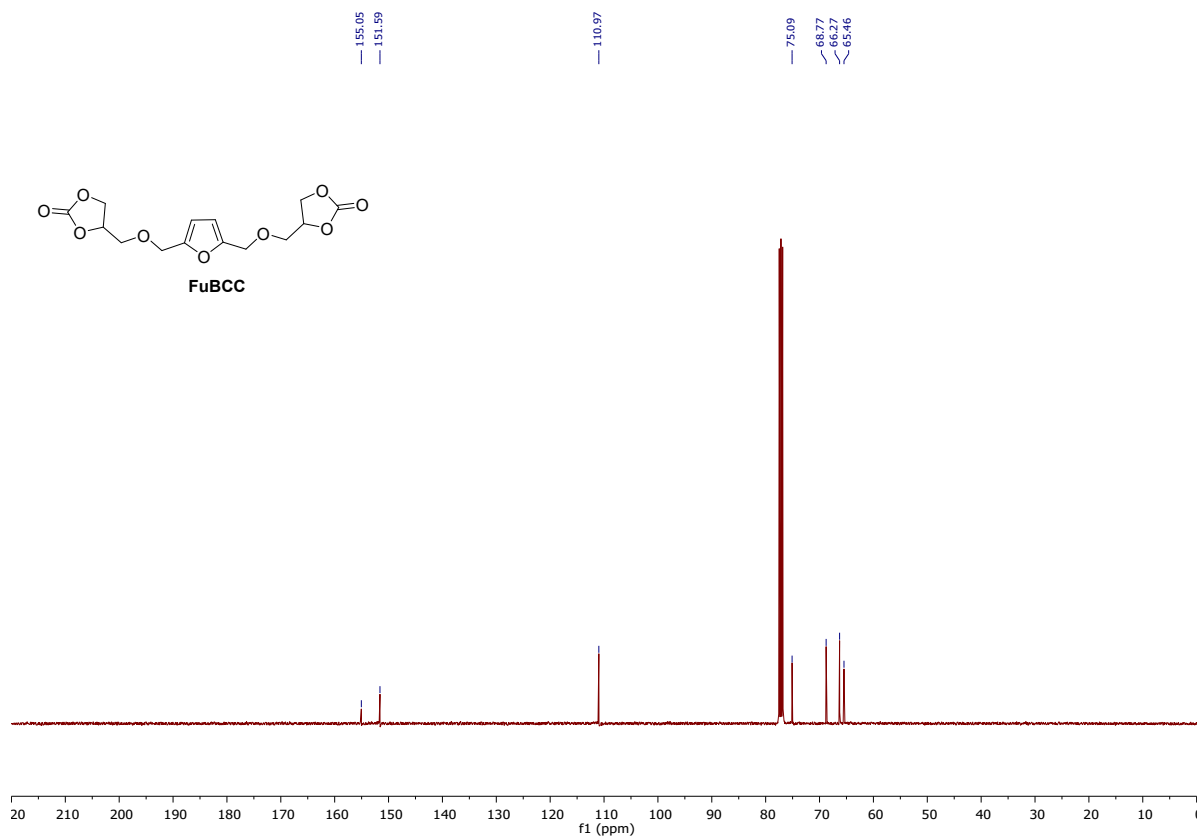

Figure S8:  $^{13}\text{C}$  NMR spectrum of FuBCC monomer in  $\text{CDCl}_3$

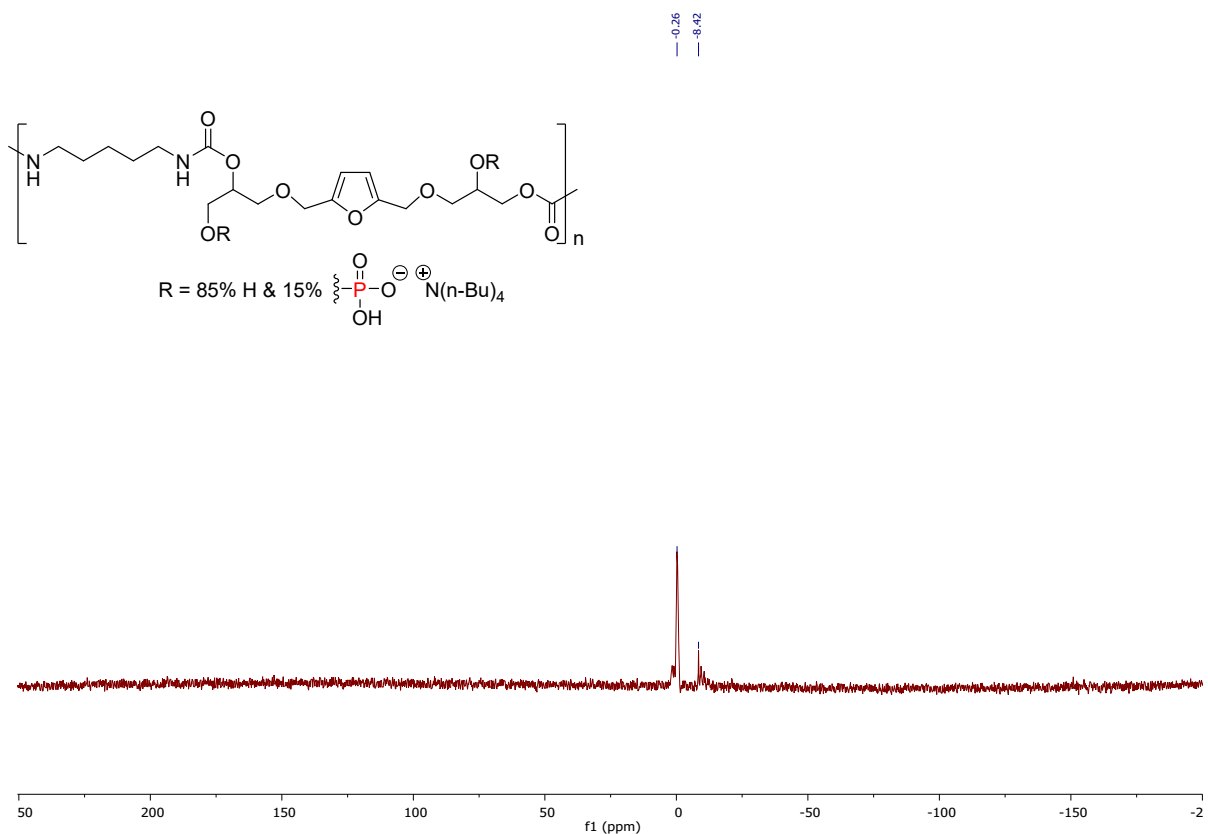

Figure S9:  $^{31}\text{P}$  NMR spectrum of Poly(FuCa)-P15 in  $\text{DMSO-d}_6$

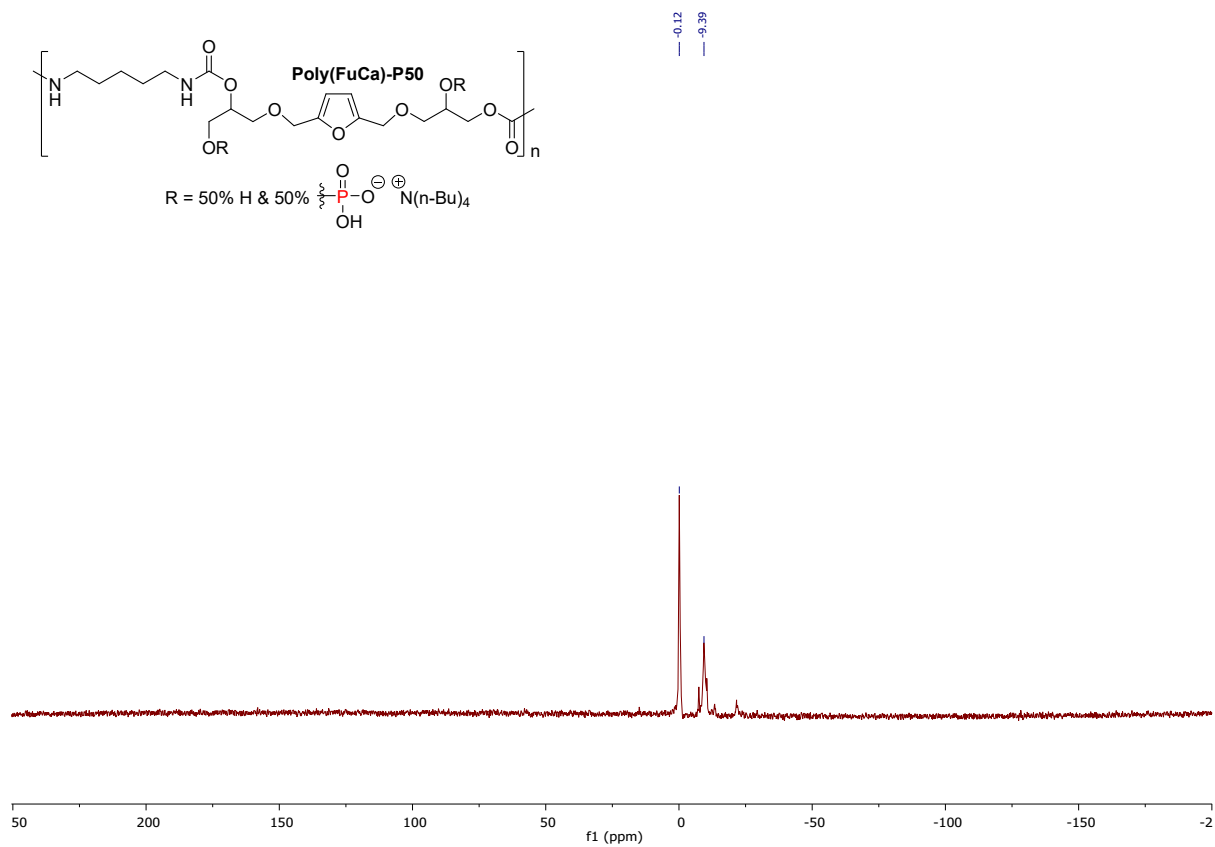

Figure S10:  $^{31}\text{P}$  NMR spectrum of Poly(FuCa)-P50 in  $\text{DMSO-d}_6$

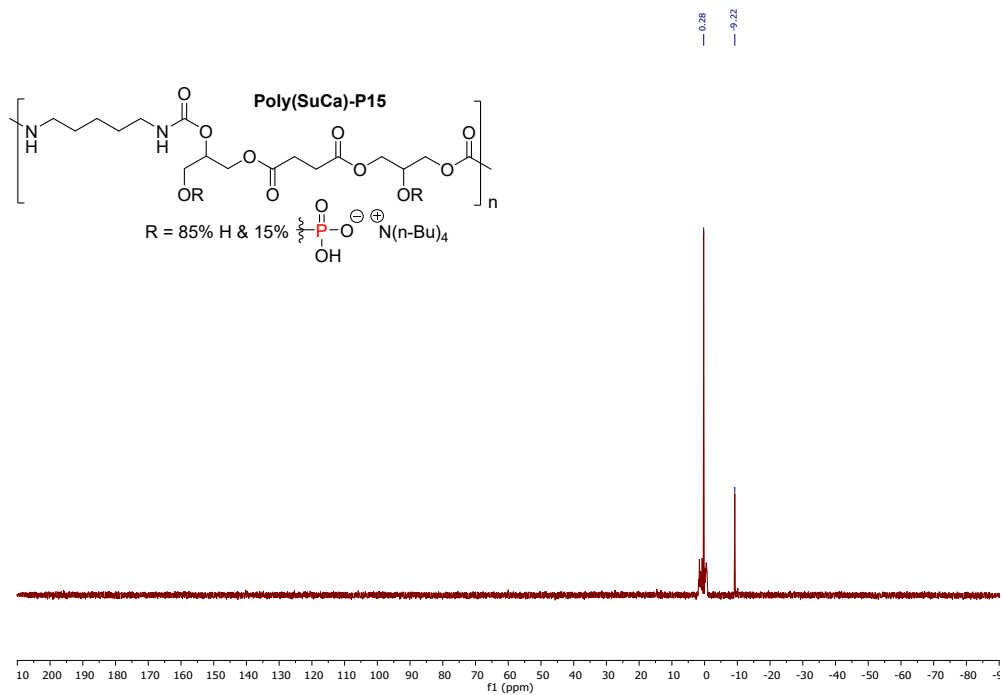

Figure S11:  $^{31}\text{P}$  NMR spectrum of Poly(SuCa)-P15 in  $\text{DMSO-}d_6$

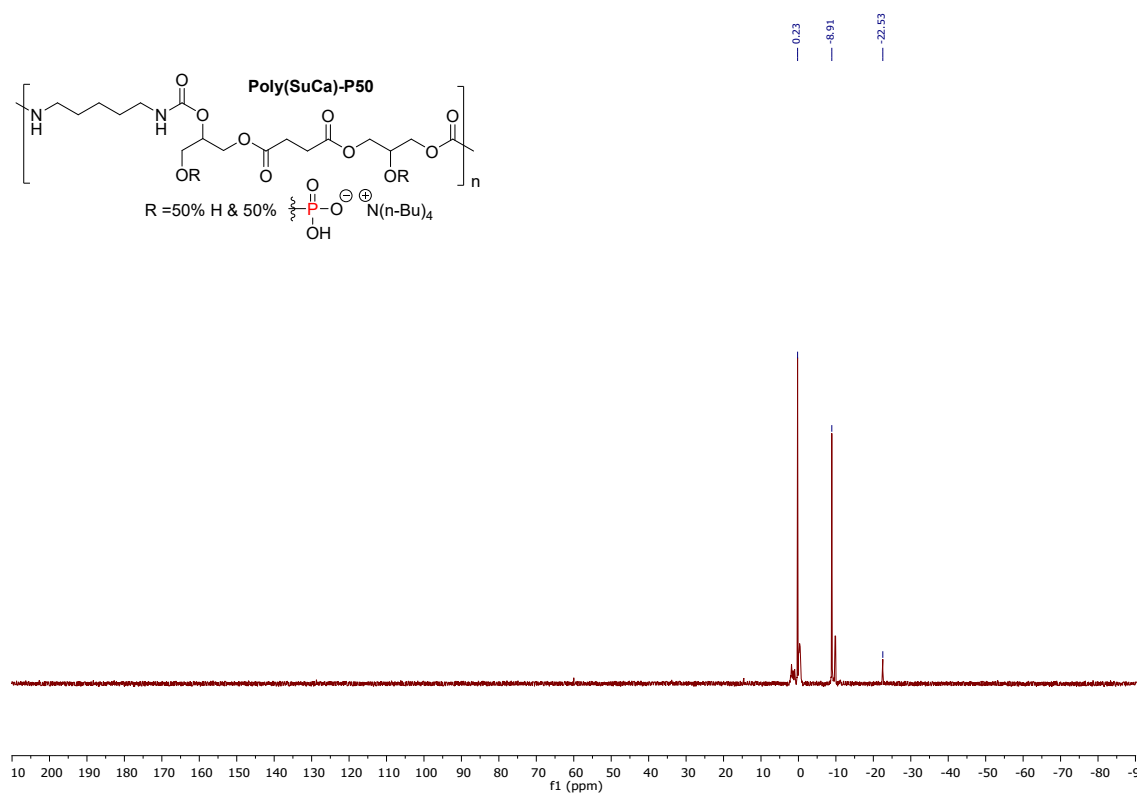

Figure S12:  $^{31}\text{P}$  NMR spectrum of Poly(SuCa)-P50 in  $\text{DMSO-}d_6$



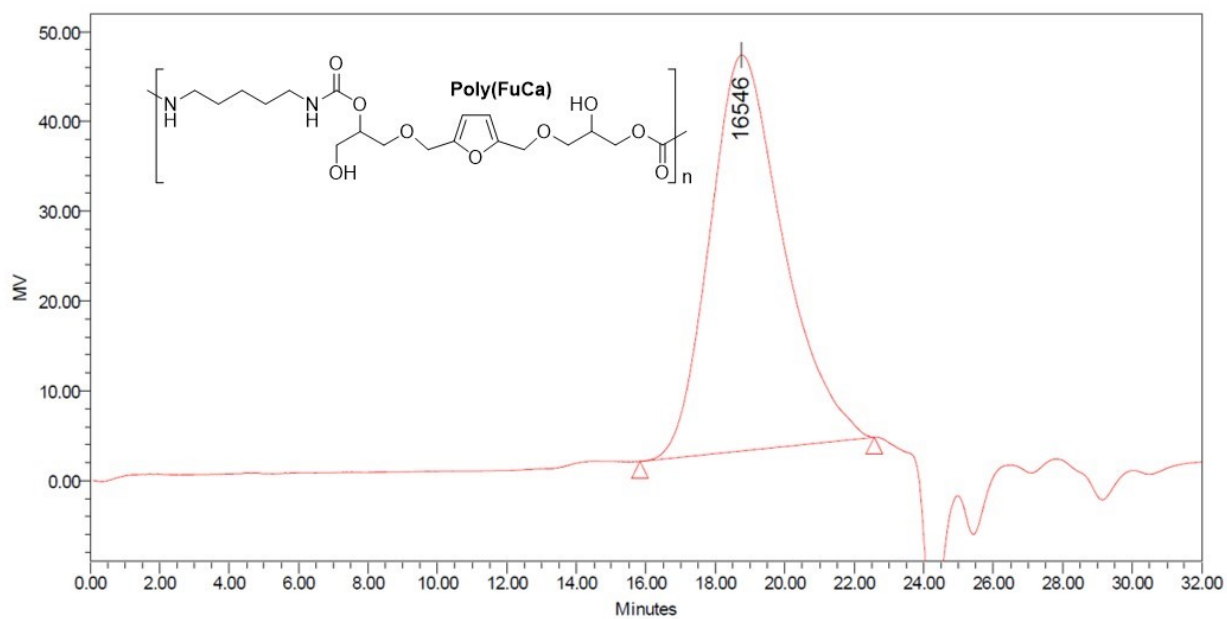

Figure S13: GPC chromatogram of Poly(FuCa)

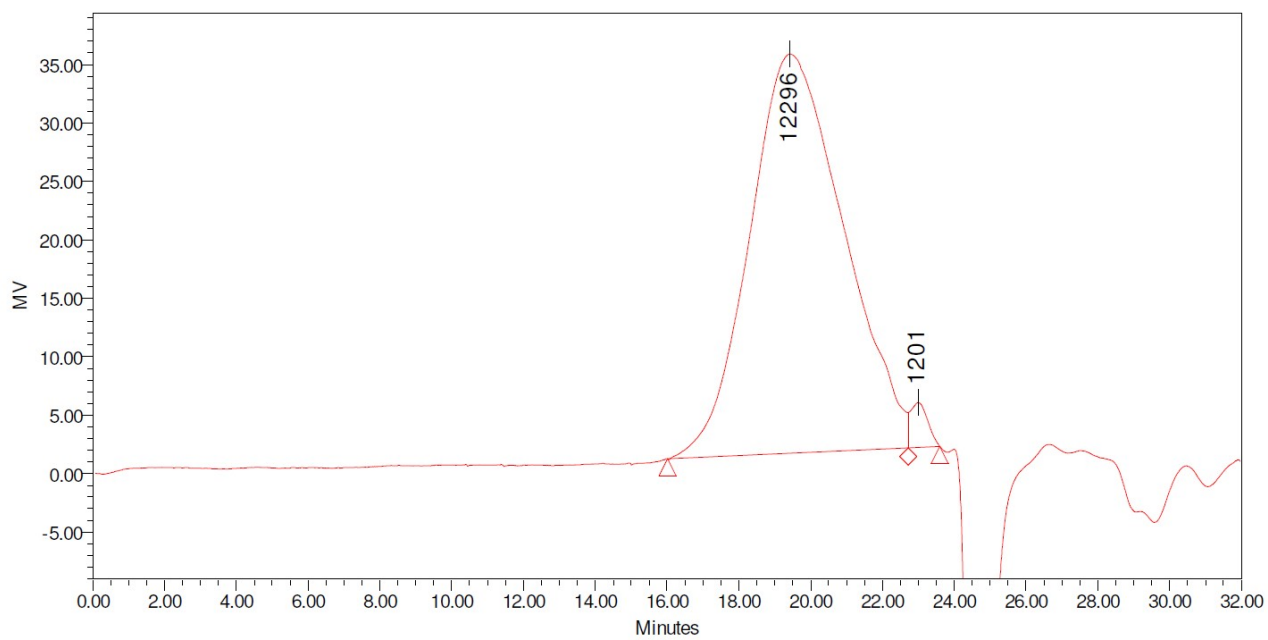

Figure S14: GPC chromatogram of Poly(SuCa)

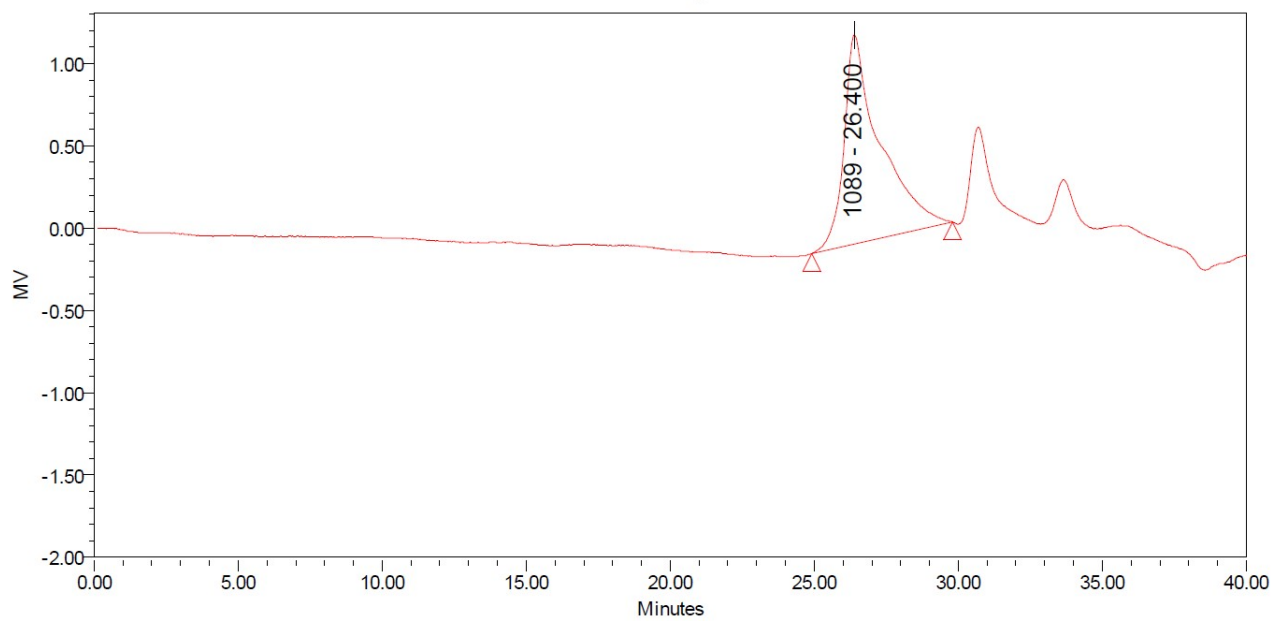

Figure S15: GPC chromatogram of Poly(FuCa)-P15

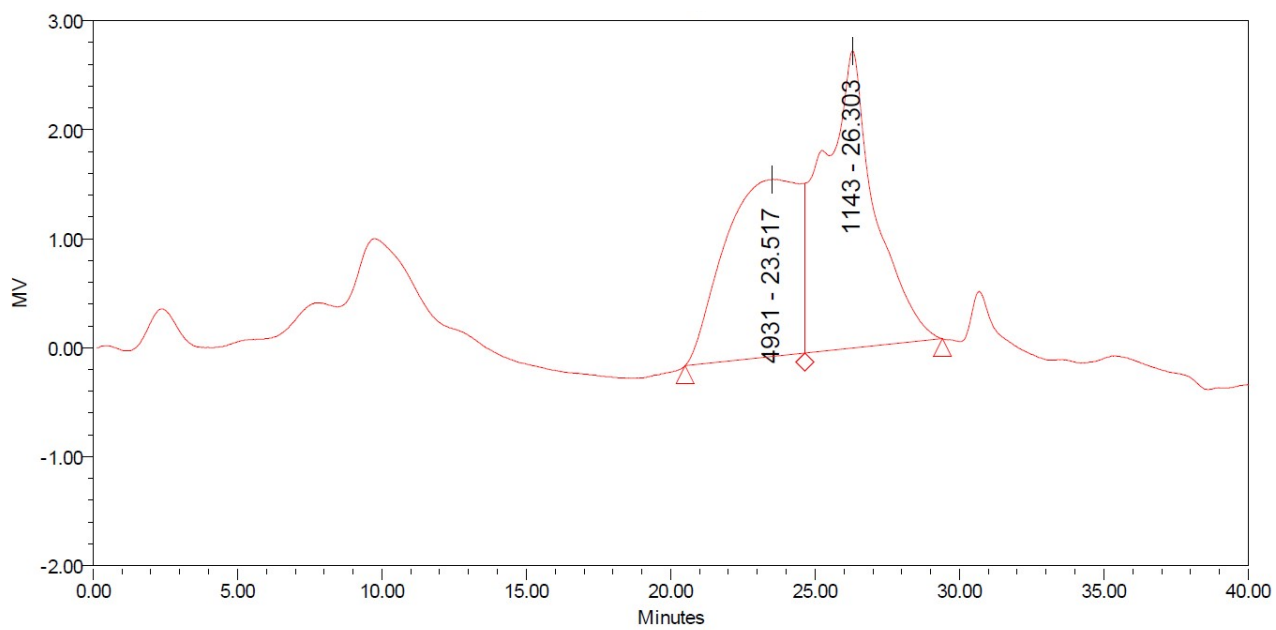

Figure S16: GPC spectrum of Poly(FuCa)-P50

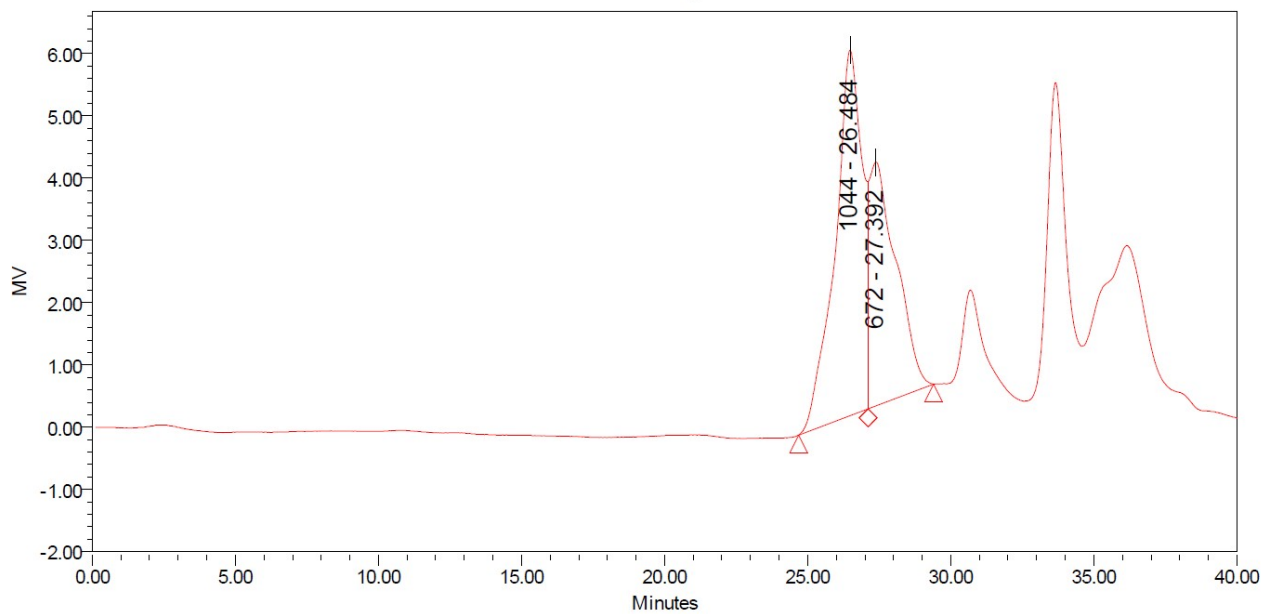

Figure S17: GPC spectrum of Poly(SuCa)-P15

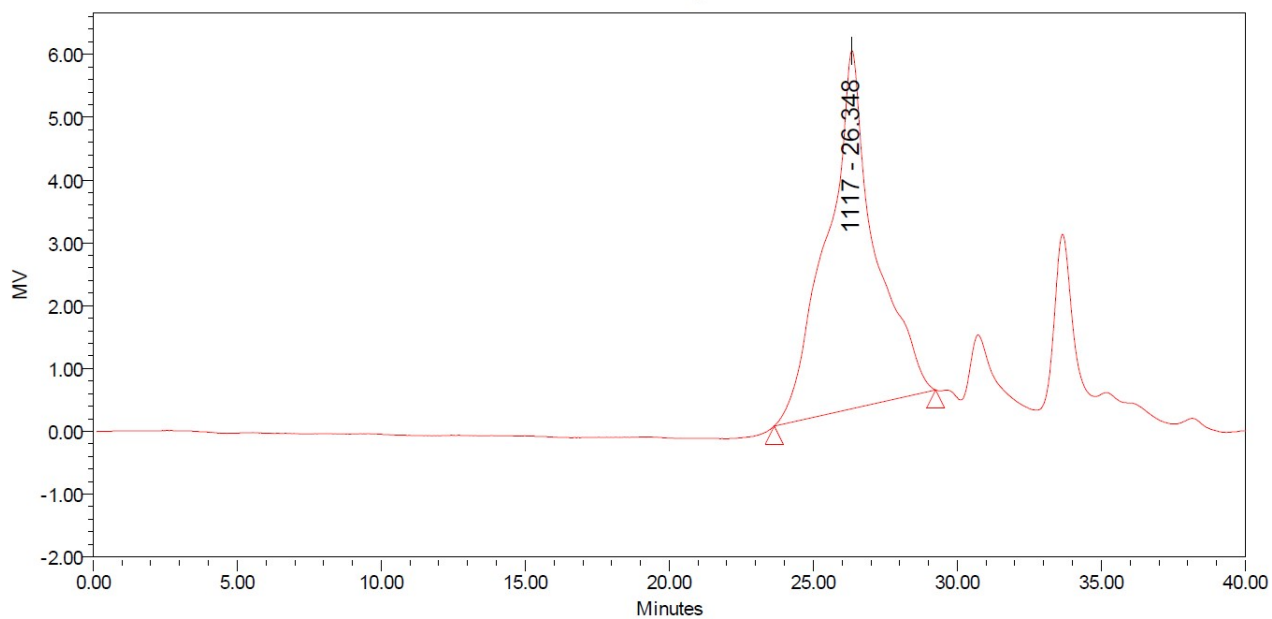

Figure S18: GPC spectrum of Poly(SuCa)-P50

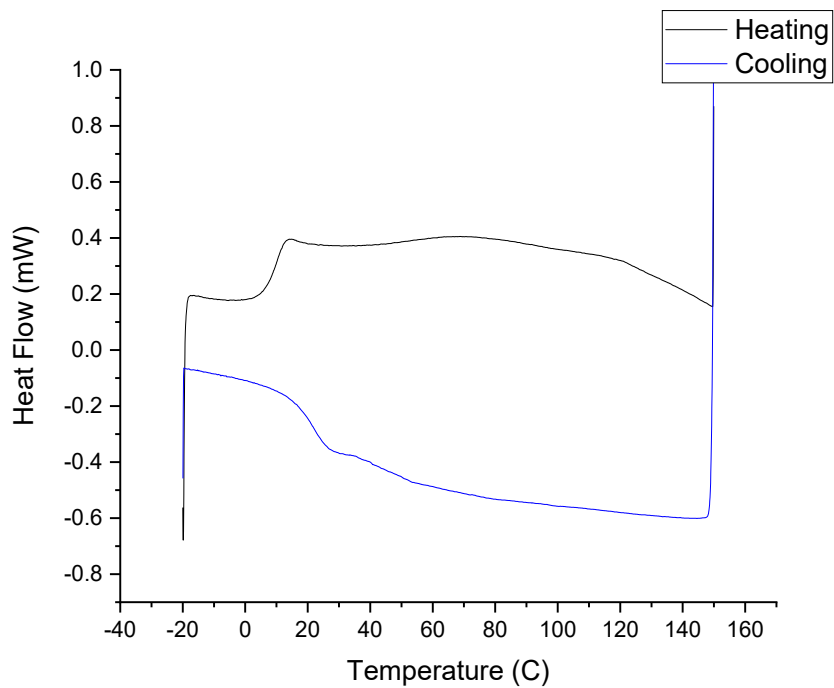

Figure S19: DSC thermogram of Poly(FuCa)

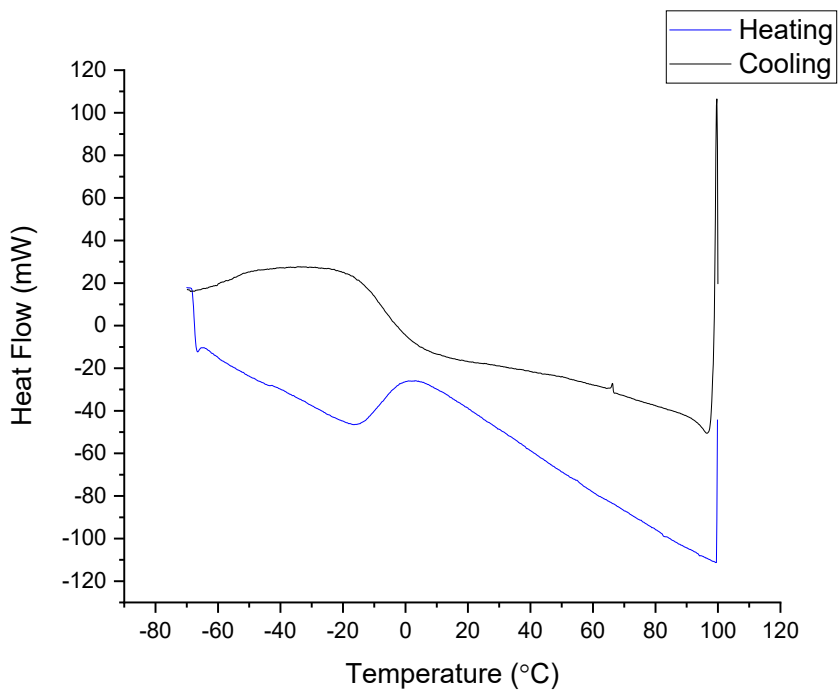

Figure S20: DSC thermogram of Poly(SuCa)

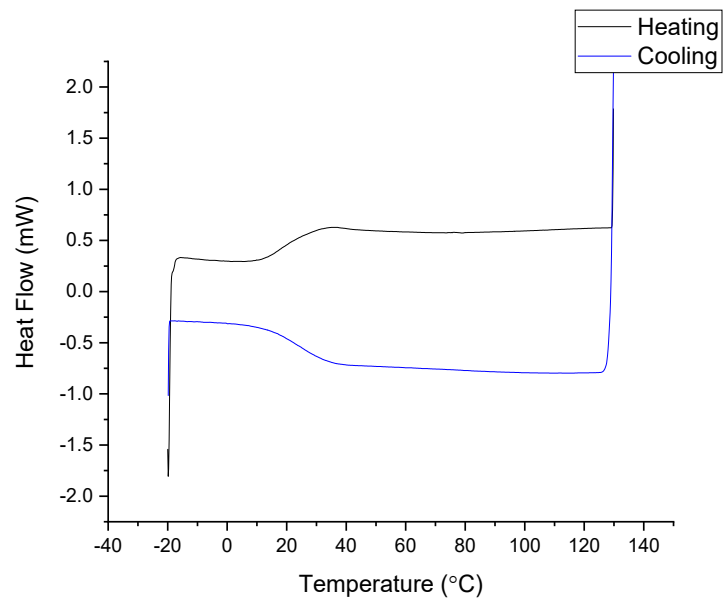

Figure S21: DSC thermogram of Poly(FuCa)-P15

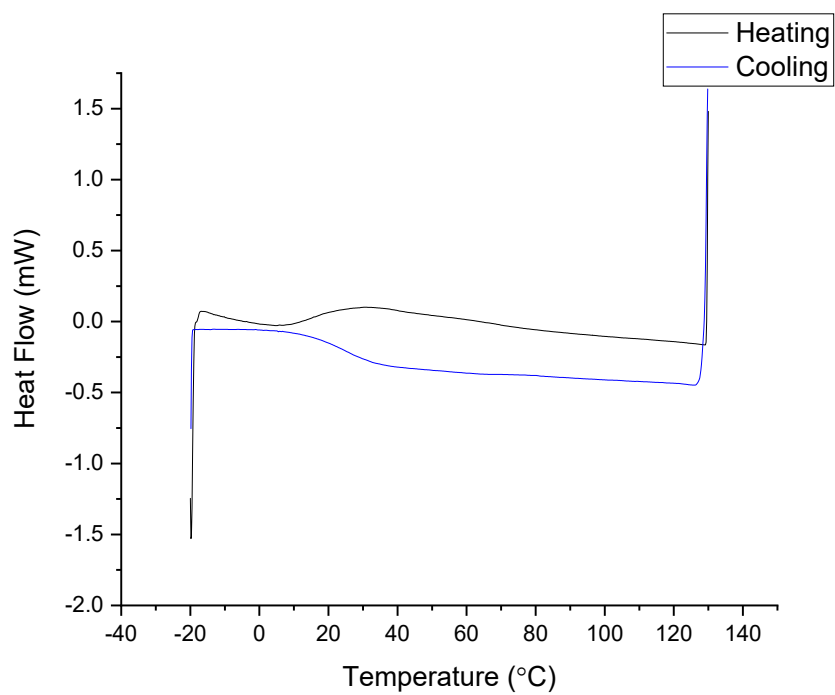

Figure S22: DSC thermogram of Poly(FuCa)-P50

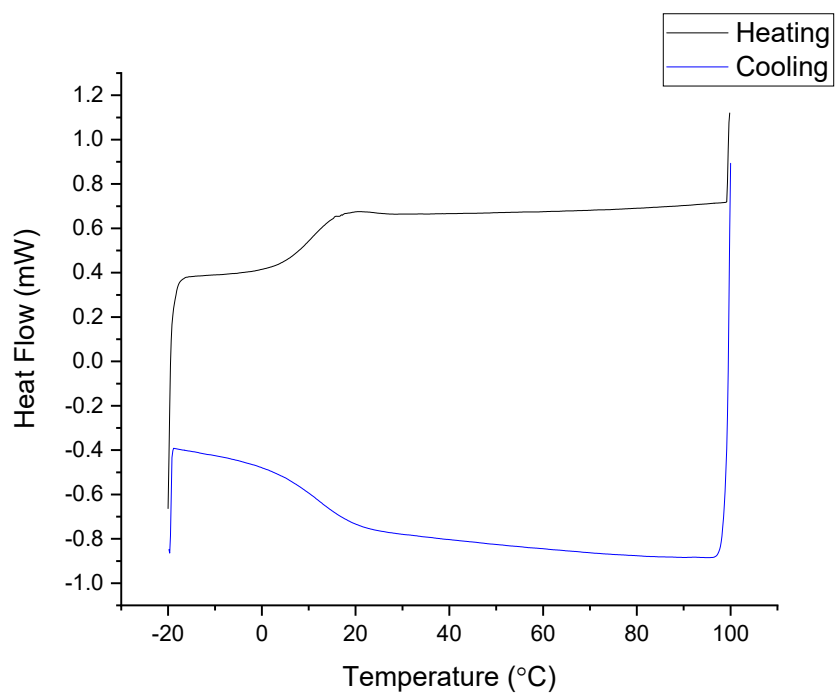

Figure S23: DSC thermogram of Poly(SuCa)-P15

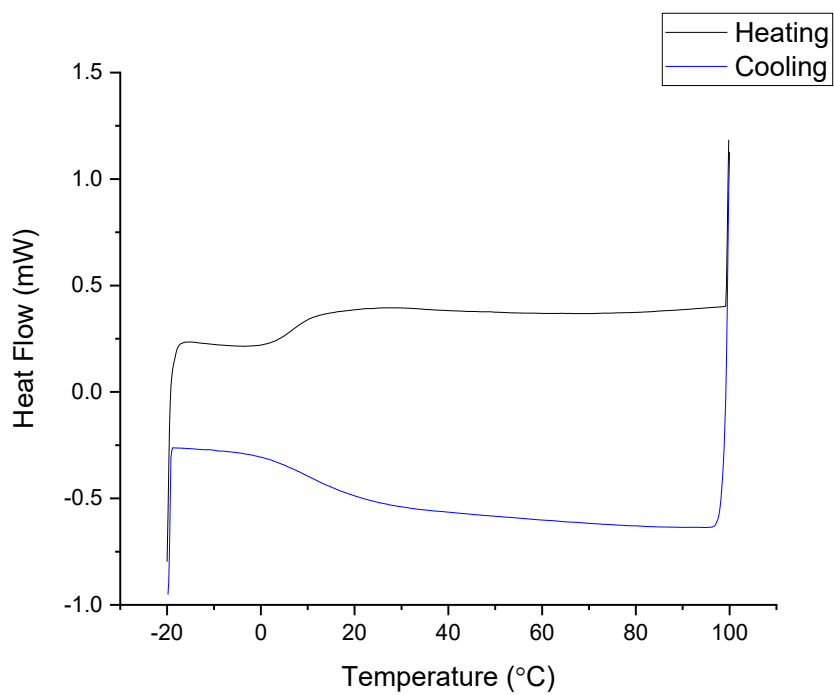

Figure S24: DSC thermogram of Poly(SuCa)-P50

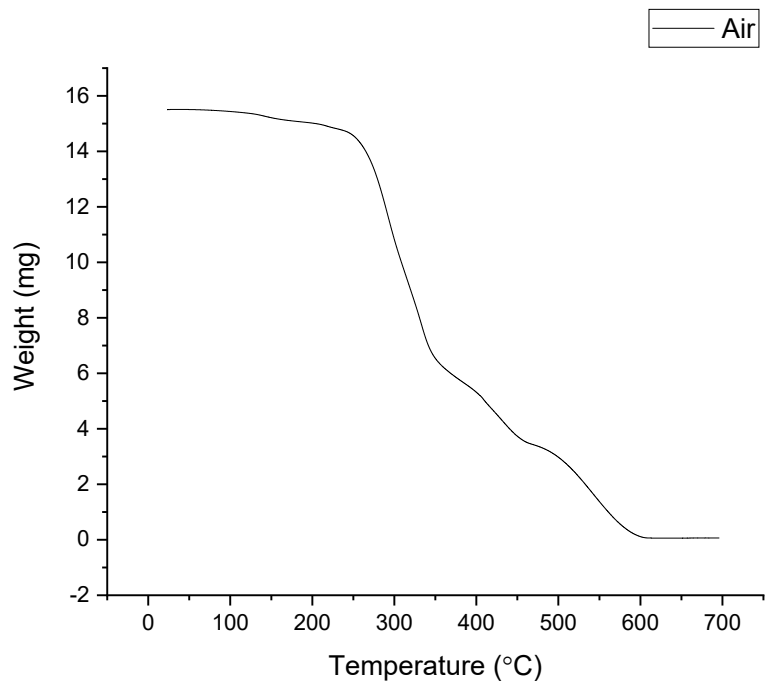

Figure S25: TGA in Air trace of Poly(FuCa)

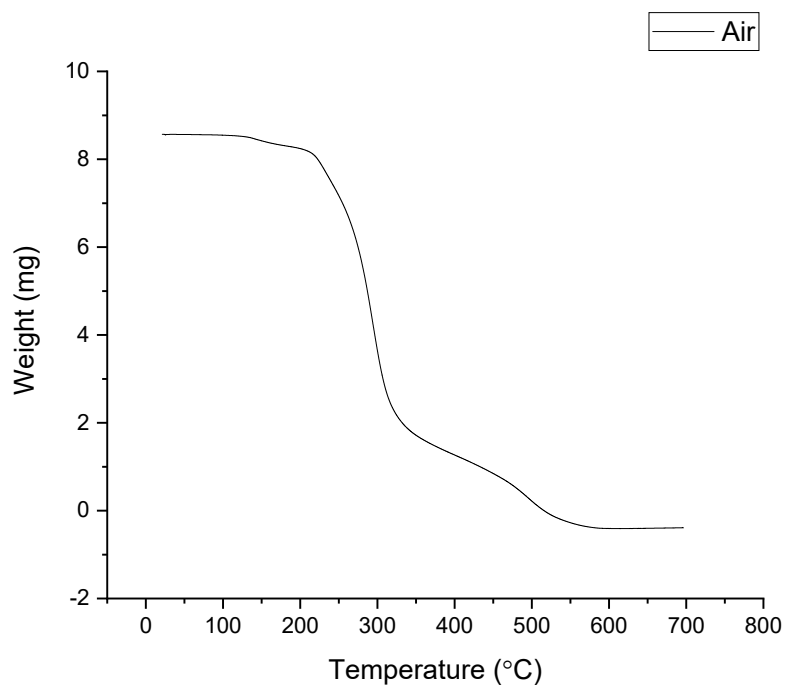

Figure S26: TGA in Air trace of Poly(SuCa)

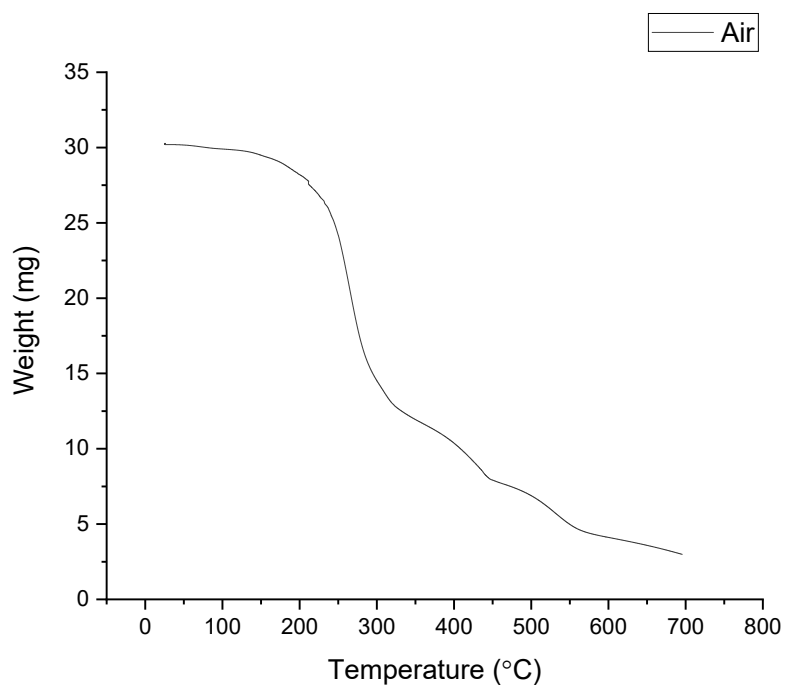

Figure S27: TGA in Air trace of Poly(FuCa)-P15

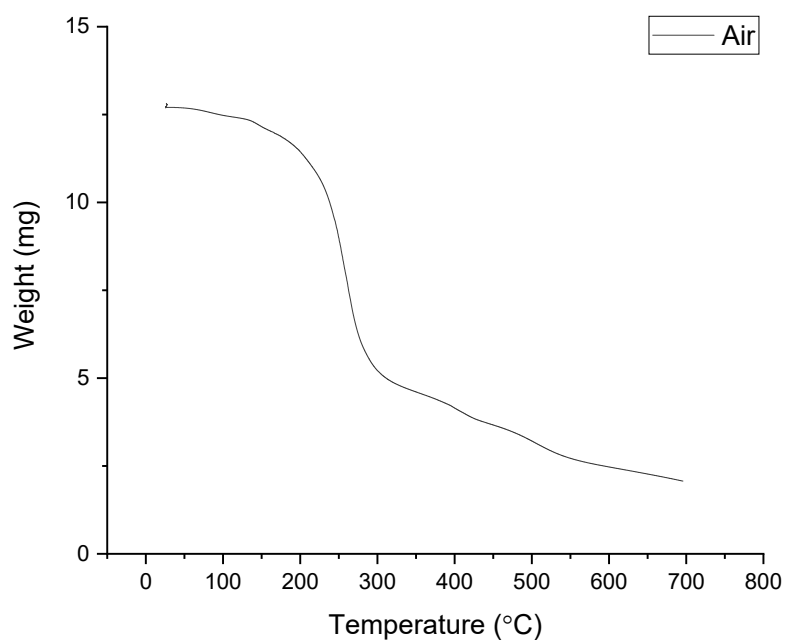

Figure S28: TGA in Air trace of Poly(FuCa)-P50



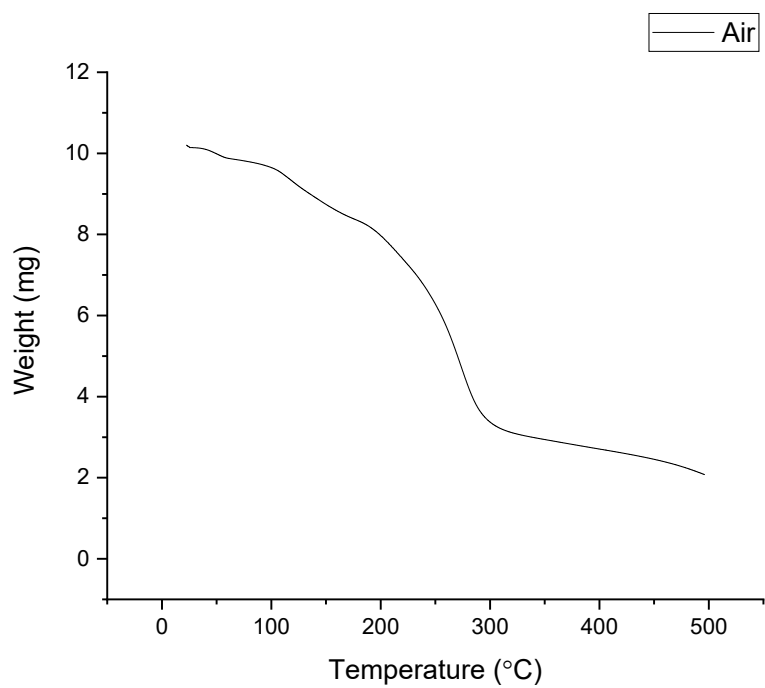

Figure S29: TGA in Air trace of Poly(SuCa)-P15

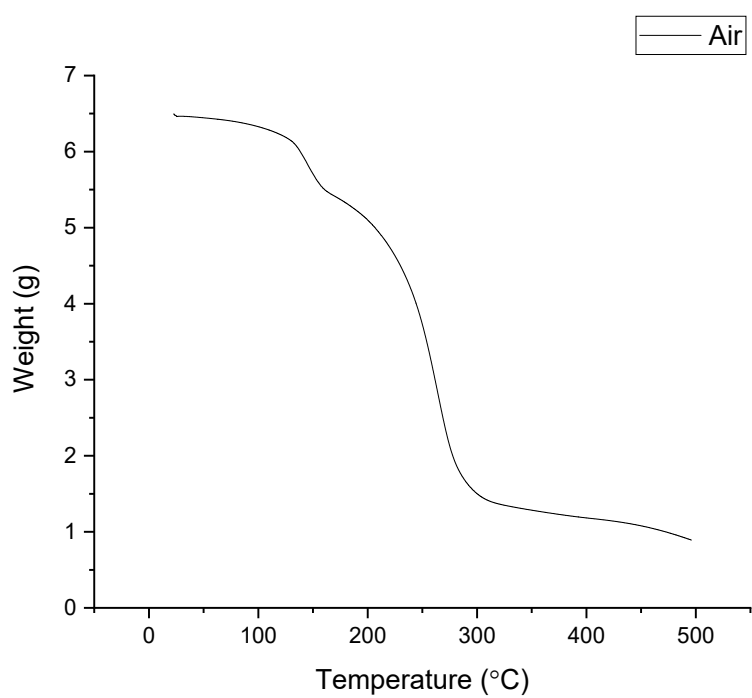

Figure S30: TGA in Air trace of Poly(SuCa)-P50

## E factor calculation

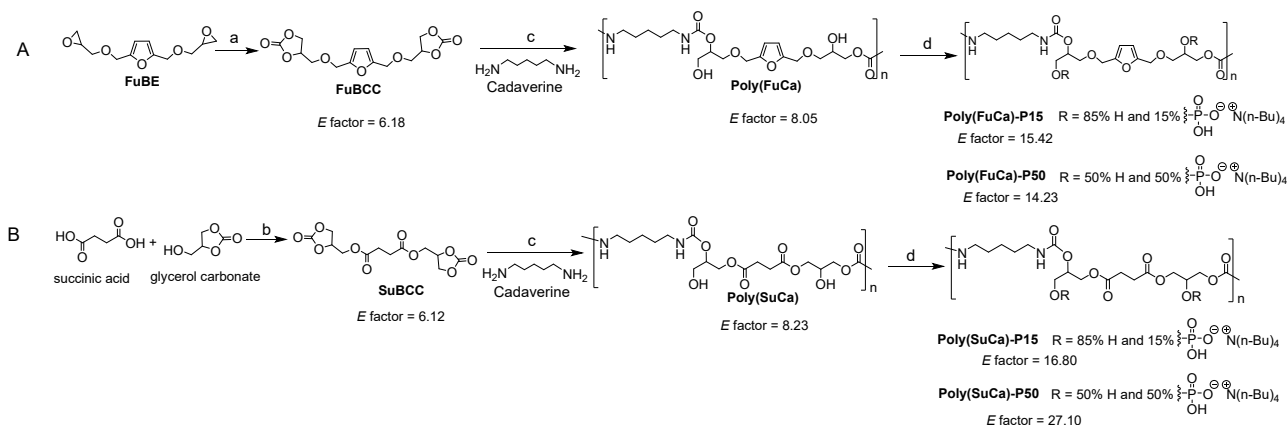

### Step A-a

| Reactants, catalyst and solvent, R                          | Amount of R, g | Product, P     | Amount of P, g |
|-------------------------------------------------------------|----------------|----------------|----------------|
| FuBE                                                        | 10.80          | FuBCC          | 12.7           |
| Catalyst (TBAP)                                             | 0.44           |                |                |
| CO <sub>2</sub> (approx. based on 20 bar in 160 mL reactor) | 6.28           |                |                |
| Ethyl Acetate, 60 mL                                        | 54.12          |                |                |
| Pet-ether, 30 mL                                            | 19.59          |                |                |
| <b>Σ R (g)</b>                                              | <b>91.23</b>   | <b>Σ P (g)</b> | <b>12.7</b>    |
| <b>Waste (g), W = ΣR - ΣP</b>                               | <b>78.53</b>   |                |                |
| <b>E-Factor = W/ΣP</b>                                      | <b>6.18</b>    |                |                |

### Step A-c

| Reactants, catalyst and solvent, R | Amount of R, g | Product, P     | Amount of P, g |
|------------------------------------|----------------|----------------|----------------|
| FuBCC                              | 10.30          | Poly(FuCa)     | 12.16          |
| Cadaverine                         | 3.22           |                |                |
| Anisole, 30 mL                     | 29.85          |                |                |
| Methanol, 3x10 mL                  | 23.94          |                |                |
| Diethyl ether, 3x20 mL             | 42.78          |                |                |
| <b>Σ R (g)</b>                     | <b>110.09</b>  | <b>Σ P (g)</b> | <b>12.16</b>   |
| <b>Waste (g), W = ΣR - ΣP</b>      | <b>97.93</b>   |                |                |
| <b>E-Factor = W/ΣP</b>             | <b>8.05</b>    |                |                |

**Step A-d-(15%)**

| Reactants, catalyst and solvent, R                     | Amount of R, g | Product, P                       | Amount of P, g |
|--------------------------------------------------------|----------------|----------------------------------|----------------|
| Poly(FuCa)                                             | 10.80          | Poly(FuCa)-P15                   | 11.047         |
| GVL (solvent), 25 mL                                   | 26.25          |                                  |                |
| TCAN, 1.5 mL                                           | 2.16           |                                  |                |
| TBAP                                                   | 3.40           |                                  |                |
| Acetonitrile, 10 mL                                    | 7.86           |                                  |                |
| Methanol, 3x10 mL                                      | 23.94          |                                  |                |
| Diethyl ether, 3x50 mL                                 | 106.95         |                                  |                |
| <b><math>\Sigma R</math> (g)</b>                       | <b>181.36</b>  | <b><math>\Sigma P</math> (g)</b> | <b>11.047</b>  |
| <b>Waste (g), <math>W = \Sigma R - \Sigma P</math></b> | <b>170.31</b>  |                                  |                |
| <b>E-Factor = <math>W/\Sigma P</math></b>              | <b>15.42</b>   |                                  |                |

**Step A-d-(50%)**

| Reactants, catalyst and solvent, R                     | Amount of R, g | Product, P                       | Amount of P, g |
|--------------------------------------------------------|----------------|----------------------------------|----------------|
| Poly(FuCa)                                             | 10.80          | Poly(FuCa)-P50                   | 15.4           |
| GVL (solvent), 25 mL                                   | 26.25          |                                  |                |
| TCAN, 6 mL                                             | 8.64           |                                  |                |
| TBAP                                                   | 18.70          |                                  |                |
| Acetonitrile, 50 mL                                    | 39.30          |                                  |                |
| Methanol, 3x10 mL                                      | 23.94          |                                  |                |
| Diethyl ether, 3x0 mL                                  | 106.95         |                                  |                |
| <b><math>\Sigma R</math> (g)</b>                       | <b>234.58</b>  | <b><math>\Sigma P</math> (g)</b> | <b>15.4</b>    |
| <b>Waste (g), <math>W = \Sigma R - \Sigma P</math></b> | <b>219.18</b>  |                                  |                |
| <b>E-Factor = <math>W/\Sigma P</math></b>              | <b>14.23</b>   |                                  |                |

**Step B-b**

| Reactants, catalyst and solvent, R                     | Amount of R, g | Product, P                       | Amount of P, g |
|--------------------------------------------------------|----------------|----------------------------------|----------------|
| Succinic acid                                          | 98.00          | SuBCC                            | 211            |
| Glycerol carbonate                                     | 200.00         |                                  |                |
| Toluene, 750 mL                                        | 650.25         |                                  |                |
| Catalyst (p-TSA)                                       | 2.00           |                                  |                |
| Acetone, 200 mL                                        | 156.80         |                                  |                |
| Ethanol, 500 mL                                        | 394.50         |                                  |                |
| <b><math>\Sigma R</math> (g)</b>                       | <b>1501.55</b> | <b><math>\Sigma P</math> (g)</b> | <b>211</b>     |
| <b>Waste (g), <math>W = \Sigma R - \Sigma P</math></b> | <b>1290.55</b> |                                  |                |
| <b>E-Factor = <math>W/\Sigma P</math></b>              | <b>6.12</b>    |                                  |                |

**Step B-e**

| Reactants, catalyst and solvent, R                     | Amount of R, g | Product, P                       | Amount of P, g |
|--------------------------------------------------------|----------------|----------------------------------|----------------|
| SuBCC                                                  | 10.00          | Poly(SuCa)                       | 11.89          |
| Cadavarine                                             | 3.22           |                                  |                |
| Anisol, 30 mL                                          | 29.85          |                                  |                |
| Methanol, 3x10 mL                                      | 23.94          |                                  |                |
| Diethyl ether, 3x20 mL                                 | 42.78          |                                  |                |
| <b><math>\Sigma R</math> (g)</b>                       | <b>109.79</b>  | <b><math>\Sigma P</math> (g)</b> | <b>11.89</b>   |
| <b>Waste (g), <math>W = \Sigma R - \Sigma P</math></b> | <b>97.9</b>    |                                  |                |
| <b>E-Factor = <math>W/\Sigma P</math></b>              | <b>8.23</b>    |                                  |                |

**Step B-f-(15%)**

| Reactants, catalyst and solvent, R                     | Amount of R, g | Product, P                       | Amount of P, g |
|--------------------------------------------------------|----------------|----------------------------------|----------------|
|                                                        |                | Poly(SuCa)-P-                    |                |
| Poly(SuCa)                                             | 15.00          | 15                               | 15.71          |
| GVL-(solvent), 50 mL                                   | 52.50          |                                  |                |
| TCAN, 2.2 mL                                           | 3.17           |                                  |                |
| TBAP                                                   | 4.75           |                                  |                |
| Methanol, 3x15 mL                                      | 35.91          |                                  |                |
| Ether, 3x75 mL                                         | 160.43         |                                  |                |
| Acetonitrile, 10 mL                                    | 7.86           |                                  |                |
| <b><math>\Sigma R</math> (g)</b>                       | <b>279.61</b>  | <b><math>\Sigma P</math> (g)</b> | <b>15.71</b>   |
| <b>Waste (g), <math>W = \Sigma R - \Sigma P</math></b> | <b>263.90</b>  |                                  |                |
| <b>E-Factor = <math>W/\Sigma P</math></b>              | <b>16.80</b>   |                                  |                |

**Step B-f-(50%)**

| Reactants, catalyst and solvent, R                     | Amount of R, g | Product, P                       | Amount of P, g |
|--------------------------------------------------------|----------------|----------------------------------|----------------|
| Poly(SuCa)                                             | 1.05           | Poly(SuCa)-P50                   | 0.9157         |
| GVL-(solvent), 2.5 mL                                  | 2.63           |                                  |                |
| TCAN, 0.6 mL                                           | 3.17           |                                  |                |
| TBAP                                                   | 1.87           |                                  |                |
| Methanol, 3x1 mL                                       | 2.39           |                                  |                |
| Ether, 3x5 mL                                          | 10.70          |                                  |                |
| Acetonitrile, 5 mL                                     | 3.93           |                                  |                |
| <b><math>\Sigma R</math> (g)</b>                       | <b>25.73</b>   | <b><math>\Sigma P</math> (g)</b> | <b>0.9157</b>  |
| <b>Waste (g), <math>W = \Sigma R - \Sigma P</math></b> | <b>24.82</b>   |                                  |                |
| <b>E-Factor = <math>W/\Sigma P</math></b>              | <b>27.10</b>   |                                  |                |

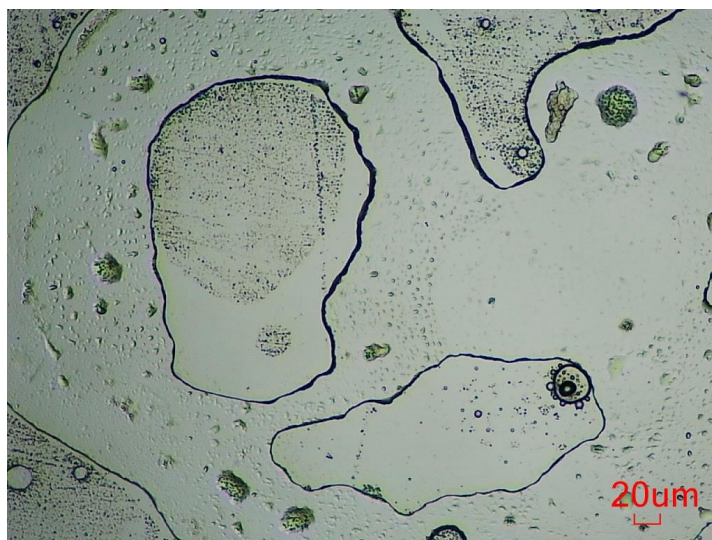

Figure S31: Microscopic image of olive oil in water emulsions without the use of any additive taken after leaving the emulsions for 24 h.
